# Supplementary material for: Evaluation of the potential use of e-fuels in the European aviation sector: a comprehensive economic and environmental assessment including externalities
Source: Royal Society of Chemistry journal article supplement (doi:10.1039/d2se00757f), 2022-01-01
Supplement: d2se00757f1.pdf [file d2se00757f1.pdf]

## Supplementary material to "Evaluation of the potential use of e-fuels in the European aviation sector: A comprehensive economic and environmental assessment including externalities."

Diego Freire Ordóñez,<sup>ab</sup> Thorsteinn Halfdanarson,<sup>c</sup> Caroline Ganzer,<sup>ac</sup> Nilay Shah,<sup>a</sup> Niall Mac Dowell,<sup>ac</sup> and Gonzalo Guillén-Gosalbez<sup>\*d</sup>

---

<sup>a.</sup> The Sargent Centre for Process Systems Engineering, Imperial College London, UK.

<sup>b.</sup> Institute for Applied Sustainability Research, Quito, Ecuador

<sup>c.</sup> Centre for Environmental Policy, Imperial College London, UK

<sup>d.</sup> Institute for Chemical and Bioengineering, ETH Zürich, Switzerland. E-mail:

[gonzalo.quillen.gosalbez@chem.ethz.ch](mailto:gonzalo.quillen.gosalbez@chem.ethz.ch)

---

### Contents

|                                                         |    |
|---------------------------------------------------------|----|
| Abbreviations .....                                     | 2  |
| Appendix A e-fuel composition and main properties ..... | 3  |
| Appendix B LCA inventories .....                        | 4  |
| Appendix C Data for the economic evaluation .....       | 7  |
| Appendix D LCA results at midpoint level .....          | 9  |
| References .....                                        | 11 |

---

This document is divided into four appendixes, including critical data used in the calculations and some intermediate results as explained hereafter. In Appendix A, the design parameters of the Fischer-Tropsch (*FT*) and hydrocracking (*HC*) processes are given, along with the simulation results of a basic characterisation of e-jet fuel, including the weight-based distribution, density, net heating value (*NHV*), boiling point, flash point and freezing point, compared with standard values for conventional jet fuel A-1. Appendix B includes the life-cycle inventory (*LCI*) utilised for the *LCA* of green H<sub>2</sub> and e-jet fuels, the combustion factors for the fuels and additional information regarding the particular processes not included in Ecoinvent 3.5. Appendix C provides the information required for the economic assessment of green H<sub>2</sub> and e-jet fuels, *i.e.*, economic parameters and assumptions, equipment cost data, and costs of raw materials, utilities and by-products. Finally, in Appendix D, the *ReCiPe* 2016 *LCA* results at the midpoint level of the studied e-jet fuels are provided.

## Abbreviations

|          |                                                                    |       |                                         |
|----------|--------------------------------------------------------------------|-------|-----------------------------------------|
| $\alpha$ | Chain growth probability                                           | ACC   | Annualised capital cost                 |
| AP       | Annual production                                                  | APOS  | Allocation at the point of substitution |
| ASF      | Anderson-Schulz-Flory                                              | BAU   | Business as usual                       |
| BECCS    | Bioenergy with carbon capture and storage/sequestration            | BOP   | Balance of plant                        |
| CCU      | Carbon capture and utilisation                                     | CAPEX | Capital expenditure                     |
| CF       | Capacity factor                                                    | CEPCI | Chemical engineering plant cost index   |
| DE       | Germany                                                            | D     | Scaling factor                          |
| ES       | Spain                                                              | EQ    | Ecosystems quality                      |
| FR       | France                                                             | FCI   | Fixed capital investment                |
| GB       | United Kingdom                                                     | FT    | Fischer-Tropsch                         |
| HC       | Hydrocracking                                                      | GWP   | Global warming potential                |
| HI       | Heat integration                                                   | HH    | Human health                            |
| i        | Interest rate                                                      | HRAT  | Heat recovery approach temperature      |
| LCA      | Life cycle assessment                                              | IT    | Italy                                   |
| NHV      | Net heating value                                                  | MCC   | Mortality cost of carbon emissions      |
| OPEX     | Operational expenditure                                            | NPC   | Net production cost                     |
| PEM      | Polymer electrolyte membrane                                       | PC    | Purchased cost of equipment             |
| PR-BM    | Peng-Robinson equation of state with Boston-Mathias alpha function | PEMEL | PEM electrolyser                        |
| PV       | Photovoltaic                                                       | PtF   | Power-to-fuels                          |
| rWGS     | Reverse water-gas shift                                            | PtL   | Power-to-liquids                        |
| SCC      | Social cost of carbon emissions                                    | RS    | Resource scarcity                       |
| TCI      | Total capital investment                                           | S     | Actual size of equipment                |
| TRL      | Technology readiness level                                         | t     | Plant economic life                     |
| y        | Year                                                               | TOC   | Total operating cost                    |
|          |                                                                    | WC    | Working capital                         |

## Appendix A e-fuel composition and main properties

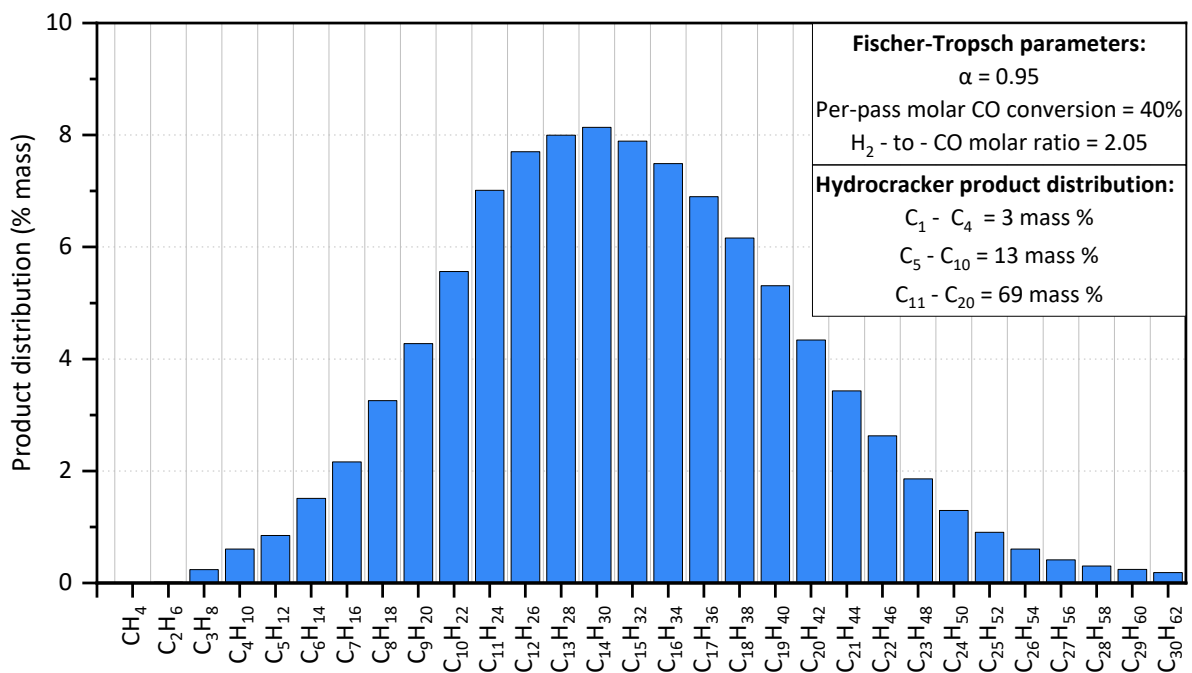

Fig. A-1: Mass-based product distribution.

Table A-1. Properties of conventional jet fuel A-1 and e-jet fuel.

| Properties                          | e-jet fuel (from simulation) | Jet fuel A-1 (according to ASTM D7566) |
|-------------------------------------|------------------------------|----------------------------------------|
| Density @ 15°C (kg/m <sup>3</sup> ) | 758.1                        | 775-840                                |
| NHV (MJ/kg)                         | 43.73                        | > 42.8                                 |
| Average boiling point (°C)          | 229.35                       | 150 to 300                             |
| Flash point (°C)                    | 39.12                        | > 38                                   |
| Freezing point (°C)                 | -51.6                        | Max. -47                               |

## Appendix B LCA inventories

Table B-1. Inventory data of the foreground system for the production of e-jet fuel after heat integration.

| <b>Products</b>                                                      |                      |                |                     |            |
|----------------------------------------------------------------------|----------------------|----------------|---------------------|------------|
| <i>Outputs to technosphere: Products and co-products</i>             | <b>Amount</b>        | <b>Unit</b>    |                     |            |
| e-jet fuel                                                           | 5.20×10 <sup>8</sup> | kg             |                     |            |
| <b>Inputs</b>                                                        |                      |                |                     |            |
| <i>Inputs from nature</i>                                            | <b>Amount</b>        | <b>Unit</b>    | <b>Distribution</b> | <b>2SD</b> |
| Air (for burner)                                                     | 1.00×10 <sup>9</sup> | kg             | Lognormal           | 1.09       |
| <i>Inputs from technosphere: materials/fuels</i>                     |                      |                |                     |            |
| Water, deionised, from tap water                                     | 6.01×10 <sup>8</sup> | kg             | Lognormal           | 1.09       |
| H <sub>2</sub> from electrolysis including storage (see Table B-3)   | 2.51×10 <sup>8</sup> | kg             | Lognormal           | 1.09       |
| Captured CO <sub>2</sub> (see Table B-4)                             | 1.95×10 <sup>9</sup> | kg             | Lognormal           | 1.09       |
| rWGS: nickel-based catalyst <sup>1,2</sup>                           | 9.68×10 <sup>2</sup> | kg             | Lognormal           | 1.09       |
| FT: cobalt-based catalyst <sup>3,4</sup>                             | 7.34×10 <sup>2</sup> | kg             | Lognormal           | 1.09       |
| HC: platinum-based catalyst <sup>5,6</sup>                           | 1.15×10 <sup>3</sup> | kg             | Lognormal           | 1.09       |
| Steel, chromium steel 18/8, with 70% end-life recycling <sup>7</sup> | 4.04×10 <sup>6</sup> | kg             | Lognormal           | 1.09       |
| <i>Inputs from technosphere: electricity/heat</i>                    |                      |                |                     |            |
| Electricity, high voltage, market for                                | 1.01×10 <sup>6</sup> | MWh            | Lognormal           | 1.09       |
| Cooling water <sup>8</sup>                                           | 2.03×10 <sup>6</sup> | MWh            | Lognormal           | 1.09       |
| <b>Outputs</b>                                                       |                      |                |                     |            |
| <i>Emissions to air</i>                                              |                      |                |                     |            |
| Water                                                                | 1.09×10 <sup>8</sup> | kg             | Lognormal           | 1.51       |
| Hydrogen                                                             | 9.43×10 <sup>1</sup> | kg             | Lognormal           | 1.51       |
| Carbon monoxide                                                      | 4.23×10 <sup>3</sup> | kg             | Lognormal           | 5.01       |
| Oxygen                                                               | 3.88×10 <sup>7</sup> | kg             | Lognormal           | 1.51       |
| Carbon dioxide, process                                              | 3.50×10 <sup>8</sup> | kg             | Lognormal           | 1.09       |
| <i>Outputs to technosphere: Waste treatment</i>                      |                      |                |                     |            |
| Wastewater, market for                                               | 2.42×10 <sup>6</sup> | m <sup>3</sup> | Lognormal           | 1.09       |
| Catalysts, used                                                      | 2.35×10 <sup>7</sup> | kg             | Lognormal           | 1.09       |

**Table B-2. Emission factors for the combustion of e-jet fuel and fossil jet fuel.**

|                               | Feedstock/Product | Fossil fuel emissions <sup>9</sup> | e-jet fuel emissions* | Unit                         |
|-------------------------------|-------------------|------------------------------------|-----------------------|------------------------------|
| CO <sub>2</sub>               | Product           | 3.16                               | 3.09                  | kg CO <sub>2</sub> /kg fuel  |
| H <sub>2</sub> O              | Product           | 1.24                               | 1.21                  | kg H <sub>2</sub> O /kg fuel |
| NO <sub>x</sub>               | Product           | 1.00                               | 0.98                  | kg NO <sub>x</sub> /kg fuel  |
| CO                            | Product           | 1.75                               | 1.71                  | kg CO/kg fuel                |
| Air (24 wt.% O <sub>2</sub> ) | Feedstock         | 14.17                              | 13.84                 | kg air/kg fuel               |

\* From the carbon balance of the components in the e-jet fuel product stream

**Table B-3. Inventory data of the foreground system per kilogram of H<sub>2</sub> (30 bar) based on the results of the gAWE model for each location.**

| Products                                                                                         | GB     | DE     | FR      | ES     | IT     |      |
|--------------------------------------------------------------------------------------------------|--------|--------|---------|--------|--------|------|
| <u>Outputs to technosphere: Products and co-products</u>                                         |        |        |         |        |        |      |
|                                                                                                  | Amount | Amount | Amount  | Amount | Amount | Unit |
| H <sub>2</sub> from electrolysis                                                                 | 1      | 1      | 1       | 1      | 1      | kg   |
| O <sub>2</sub> from electrolysis                                                                 | 7.94   | 7.94   | 7.94    | 7.94   | 7.94   | kg   |
| <b>Inputs</b>                                                                                    |        |        |         |        |        |      |
| <u>Inputs from technosphere: materials/fuels</u>                                                 |        |        |         |        |        |      |
| Water, deionised, from tap water                                                                 | 8.94   | 8.94   | 8.94    | 8.94   | 8.94   | kg   |
| H <sub>2</sub> storage required (Type I tanks <sup>10,11</sup> or salt caverns <sup>12,+</sup> ) | 0.0128 | 0.0265 | 0.01429 | 0.0238 | 0.0207 | kg   |
| <u>Inputs from technosphere: electricity/heat</u>                                                |        |        |         |        |        |      |
| Electricity, photovoltaic, open ground installation*                                             | 9.41   | 25.22  | 20.21   | 14.75  | 30.12  | kWh  |
| Electricity, wind, >3MW turbine*                                                                 | 46.89  | 31.08  | 36.09   | 41.55  | 26.18  | kWh  |

\* \*Here, only the electricity consumption for compression and drying is considered

\* We assume a current energy demand for water electrolysis of 56.3 kWh/kg H<sub>2</sub> (59% efficiency) <sup>13,14</sup>

**Table B-4. Inventory data of the foreground system per kilogram of captured CO<sub>2</sub> (1 bar) for each source.**

| <b>Products</b>                                                      | <b>C-PP<sup>15</sup></b> | <b>NG-PP<sup>16</sup></b> | <b>DAC-HT<sup>17</sup></b> | <b>DAC-LT<sup>18</sup></b> |                |
|----------------------------------------------------------------------|--------------------------|---------------------------|----------------------------|----------------------------|----------------|
| <u>Outputs to technosphere: Products and co-products</u>             |                          |                           |                            |                            |                |
|                                                                      | <b>Amount</b>            | <b>Amount</b>             | <b>Amount</b>              | <b>Amount</b>              | <b>Unit</b>    |
| Captured CO <sub>2</sub>                                             | 1                        | 1                         | 1                          | 1                          | kg             |
| <u>Outputs to technosphere: Avoided products</u>                     |                          |                           |                            |                            |                |
| Electricity, high voltage, production                                | 0.88                     | 3.29                      |                            |                            | kWh            |
| <b>Inputs</b>                                                        |                          |                           |                            |                            |                |
| <u>Inputs from nature</u>                                            |                          |                           |                            |                            |                |
| Air                                                                  |                          | 20193.55                  |                            |                            | g              |
| Cooling water, unspecified natural origin                            |                          | 1451.61                   |                            |                            | g              |
| <u>Inputs from technosphere: materials/fuels</u>                     |                          |                           |                            |                            |                |
| Light fuel oil, market for                                           | 6.22                     |                           |                            |                            | g              |
| Natural gas liquids, market for                                      | 0.82                     | 478.45                    | 125.00                     |                            | g              |
| Hard coal, market for                                                | 521.09                   |                           |                            |                            | g              |
| Monoethanolamine, market for                                         | 1.54                     | 8.77                      |                            |                            | g              |
| Neutralising agent, sodium hydroxide-equivalent, market for          | 0.12                     |                           |                            |                            | g              |
| Ammonia, liquid, market for                                          | 1.15                     |                           |                            |                            | g              |
| Limestone, crushed, washed, market for                               | 43.12                    |                           |                            |                            | g              |
| Tap water, market for                                                |                          | 1064.52                   | 3105.26                    |                            | g              |
| Spent catalyst, market for                                           |                          | 0.0029                    |                            |                            | g              |
| Calcium carbonate, precipitated, market for                          |                          |                           | 19.88                      |                            | g              |
| Adsorbent (Amine on alumina) <sup>18</sup>                           |                          |                           |                            | 7.5                        | g              |
| <u>Inputs from technosphere: electricity/heat</u>                    |                          |                           |                            |                            |                |
| Electricity, high voltage, production mix                            |                          |                           | 0.2340                     | 0.7                        | kWh            |
| Heat, district or industrial, municipal waste incinerat., market for |                          |                           |                            | 11.9                       | MJ             |
| <b>Outputs</b>                                                       |                          |                           |                            |                            |                |
| <u>Emissions to air</u>                                              |                          |                           |                            |                            |                |
| Particulates, < 2.5 um                                               | 0.11                     |                           |                            |                            | g              |
| Ammonia                                                              | 0.27                     |                           |                            |                            | g              |
| Monoethanolamine                                                     | 0.09                     | 3.52                      |                            |                            | g              |
| Nitrogen oxides                                                      | 1.06                     | 1.58                      |                            |                            | g              |
| Sulfur dioxide                                                       | 0.07                     |                           |                            |                            | g              |
| Carbon dioxide, fossil                                               | 52.44                    | 328.65                    | -1000                      | -1000                      | g              |
| Water                                                                |                          | 1645.16                   |                            |                            | g              |
| <u>Outputs to technosphere: Waste treatment</u>                      |                          |                           |                            |                            |                |
| Hazardous waste, treatment, underground deposit                      | 2.27                     |                           |                            |                            | g              |
| Municipal solid waste, treatment, open dump                          | 1.81                     |                           |                            |                            | g              |
| Wastewater, market for                                               |                          | 0.0016                    |                            |                            | m <sup>3</sup> |
| Spent catalyst, treatment                                            |                          | 0.0029                    |                            |                            | g              |

## Appendix C Data for the economic evaluation

**Table C-1. Economic parameters and assumptions.**

| Parameter                                | Value              |                    |                   |                    |                    |
|------------------------------------------|--------------------|--------------------|-------------------|--------------------|--------------------|
|                                          | <i>GB</i> (56, -6) | <i>DE</i> (48, 12) | <i>FR</i> (48, 0) | <i>ES</i> (40, -6) | <i>IT</i> (40, 18) |
| Location (latitude, longitude)           | <i>GB</i> (56, -6) | <i>DE</i> (48, 12) | <i>FR</i> (48, 0) | <i>ES</i> (40, -6) | <i>IT</i> (40, 18) |
| Base year                                | 2018               | 2018               | 2018              | 2018               | 2018               |
| Plant economic life (y) <sup>19-21</sup> | 20                 | 20                 | 20                | 20                 | 20                 |
| Plant availability (h/y) <sup>22</sup>   | 8260               | 8260               | 8260              | 8260               | 8260               |
| Interest rate (%) <sup>23</sup>          | 8.30%              | 6.80%              | 7.20%             | 8.20%              | 7.20%              |

**Table C-2. H<sub>2</sub> production plant: Cost input data.**

| Equipment                                        | Sizing based on:        | USD <sub>2018</sub> per size unit | Reference     |
|--------------------------------------------------|-------------------------|-----------------------------------|---------------|
| Photovoltaic (PV) solar panels                   | 1 kW installed capacity | 1210                              | <sup>24</sup> |
| Wind turbines onshore                            | 1 kW installed capacity | 1497                              | <sup>24</sup> |
| Wind turbines offshore                           | 1 kW installed capacity | 4353                              | <sup>24</sup> |
| <i>PEMEL</i>                                     | 1 kg/h H <sub>2</sub>   | 56300                             | <sup>14</sup> |
| Electrical energy storage: Lithium-ion batteries | 1 kWh electricity       | 418                               | <sup>25</sup> |
| H <sub>2</sub> storage: Type I tanks             | 1 kg H <sub>2</sub>     | 755                               | <sup>11</sup> |
| H <sub>2</sub> storage: Salt caverns             | 1 kg H <sub>2</sub>     | 215                               | <sup>26</sup> |

**Table C-3. Fuel production plant: CAPEX of special equipment cost data.**

| Equipment           | PC <sub>ref</sub> | Unit | S <sub>ref</sub> | Design variable | Unit   | D    | Reference year | Reference     |
|---------------------|-------------------|------|------------------|-----------------|--------|------|----------------|---------------|
| Burner              | 2.62              | MUSD | 20.00            | Heat duty       | MW     | 0.83 | 2014           | <sup>22</sup> |
| Hydrocracker        | 10.36             | MUSD | 1.13             | Feed rate       | kg/s   | 0.70 | 2014           | <sup>22</sup> |
| <i>rWGS</i> reactor | 3.19              | MUSD | 2556.00          | Flowrate        | t/day  | 0.65 | 2014           | <sup>22</sup> |
| <i>FT</i> reactor   | 10.50             | MUSD | 2.52             | Feed rate       | Mscf/h | 0.72 | 2003           | <sup>27</sup> |

**Table C-4. Fuel processing plant: OPEX data at 2018 prices.**

| Raw material/Utility                                     | Value for 2018 | Unit                     | Reference     |
|----------------------------------------------------------|----------------|--------------------------|---------------|
| CO <sub>2</sub> from <i>C-PP</i>                         | 0.0043         | USD <sub>2018</sub> /kg  | <sup>28</sup> |
| CO <sub>2</sub> from <i>NG-PP</i>                        | 0.064          | USD <sub>2018</sub> /kg  | <sup>28</sup> |
| CO <sub>2</sub> from <i>DAC-HT</i>                       | 0.16           | USD <sub>2018</sub> /kg  | <sup>17</sup> |
| CO <sub>2</sub> from <i>DAC-LT</i>                       | 1.10           | USD <sub>2018</sub> /kg  | <sup>29</sup> |
| Grid electricity (Non-household consumers) ( <i>GB</i> ) | 158.67         | USD <sub>2018</sub> /MWh | <sup>30</sup> |
| Grid electricity (Non-household consumers) ( <i>DE</i> ) | 127.68         | USD <sub>2018</sub> /MWh | <sup>30</sup> |
| Grid electricity (Non-household consumers) ( <i>FR</i> ) | 62.18          | USD <sub>2018</sub> /MWh | <sup>30</sup> |
| Grid electricity (Non-household consumers) ( <i>ES</i> ) | 103.16         | USD <sub>2018</sub> /MWh | <sup>30</sup> |

|                                                 |        |                          |    |
|-------------------------------------------------|--------|--------------------------|----|
| Grid electricity (Non-household consumers) (IT) | 110.72 | USD <sub>2018</sub> /MWh | 30 |
| Process H <sub>2</sub> O                        | 1.09   | USD <sub>2018</sub> /t   | 19 |
| Cooling water                                   | 1.35   | USD <sub>2018</sub> /MWh | 31 |
| Wastewater disposal                             | 0.44   | USD <sub>2018</sub> /t   | 19 |



## Appendix D LCA results at midpoint level

Table D-1. e-jet fuel from CO<sub>2</sub> from coal-based power plants (C-PP).

| Impact category                         | Unit                     | GB     |         | DE     |         | FR     |         | ES     |         | IT     |         |
|-----------------------------------------|--------------------------|--------|---------|--------|---------|--------|---------|--------|---------|--------|---------|
|                                         |                          | Tanks  | Caverns |
| Global warming                          | kg CO <sub>2</sub> eq    | 3.361  | 3.357   | 4.446  | 4.437   | 2.806  | 2.802   | 2.780  | 2.772   | 3.731  | 3.725   |
| Stratospheric ozone depletion           | mg CFC-11 eq             | 1.488  | 0.709   | 1.926  | 0.320   | 1.586  | 0.719   | 1.991  | 0.549   | 1.925  | 0.671   |
| Ionising radiation                      | kBq Co-60 eq             | 0.992  | 0.459   | 1.532  | 0.435   | 1.885  | 1.293   | 1.440  | 0.454   | 1.133  | 0.275   |
| Ozone formation, Human health           | g NO <sub>x</sub> eq     | 5.864  | 4.775   | 12.083 | 9.838   | 4.399  | 3.187   | 0.217  | -1.800  | 6.818  | 5.064   |
| Fine particulate matter formation       | g PM <sub>2.5</sub> eq   | 2.497  | 1.221   | 9.365  | 6.733   | 2.071  | 0.650   | -0.756 | -3.122  | 4.571  | 2.515   |
| Ozone formation, Terrestrial ecosystems | g NO <sub>x</sub> eq     | 6.476  | 4.902   | 13.312 | 10.069  | 5.105  | 3.354   | 1.248  | -1.666  | 7.813  | 5.280   |
| Terrestrial acidification               | g SO <sub>2</sub> eq     | 2.551  | 1.985   | 18.432 | 17.265  | 0.270  | -0.360  | -9.511 | -10.559 | 6.177  | 5.265   |
| Freshwater eutrophication               | g P eq                   | 2.108  | 1.509   | 4.895  | 3.661   | 2.141  | 1.475   | 2.530  | 1.421   | 2.772  | 1.808   |
| Marine eutrophication                   | g N eq                   | 0.258  | 0.159   | 0.523  | 0.319   | 0.296  | 0.186   | 0.344  | 0.160   | 0.359  | 0.200   |
| Terrestrial ecotoxicity                 | kg 1,4-DCB               | 33.511 | 25.618  | 60.430 | 44.160  | 41.791 | 33.006  | 41.302 | 26.682  | 51.056 | 38.348  |
| Freshwater ecotoxicity                  | kg 1,4-DCB               | 1.012  | 0.952   | 1.169  | 1.045   | 0.968  | 0.902   | 1.024  | 0.913   | 0.941  | 0.844   |
| Marine ecotoxicity                      | kg 1,4-DCB               | 1.265  | 1.181   | 1.492  | 1.319   | 1.220  | 1.127   | 1.289  | 1.133   | 1.199  | 1.063   |
| Human carcinogenic toxicity             | kg 1,4-DCB               | 0.147  | 0.183   | 0.298  | 0.373   | 0.192  | 0.232   | 0.110  | 0.177   | 0.203  | 0.262   |
| Human non-carcinogenic toxicity         | kg 1,4-DCB               | 8.383  | 6.300   | 13.386 | 9.093   | 8.794  | 6.476   | 9.975  | 6.117   | 10.207 | 6.854   |
| Land use                                | m <sup>2</sup> a crop eq | 0.340  | 0.230   | 0.694  | 0.468   | 0.427  | 0.305   | 0.413  | 0.210   | 0.593  | 0.417   |
| Mineral resource scarcity               | g Cu eq                  | 29.064 | 26.630  | 40.239 | 35.222  | 32.950 | 30.241  | 31.602 | 27.094  | 34.753 | 30.834  |
| Fossil resource scarcity                | kg oil eq                | 1.103  | 0.823   | 1.682  | 1.105   | 1.004  | 0.693   | 1.240  | 0.722   | 1.411  | 0.961   |
| Water consumption                       | m <sup>3</sup>           | 0.039  | 0.025   | 0.086  | 0.058   | 0.058  | 0.042   | 0.056  | 0.030   | 0.082  | 0.060   |

Table D-2. e-jet fuel from CO<sub>2</sub> from natural gas-based power plants (NG-PP).

| Impact category                         | Unit                     | GB     |         | DE     |         | FR     |         | ES     |         | IT     |         |
|-----------------------------------------|--------------------------|--------|---------|--------|---------|--------|---------|--------|---------|--------|---------|
|                                         |                          | Tanks  | Caverns |
| Global warming                          | kg CO <sub>2</sub> eq    | 3.651  | 3.647   | 3.770  | 3.761   | 0.751  | 0.746   | 1.833  | 1.825   | 2.636  | 2.629   |
| Stratospheric ozone depletion           | mg CFC-11 eq             | 0.981  | 0.202   | 1.736  | 0.130   | -0.356 | -1.222  | 0.768  | -0.674  | 0.775  | -0.479  |
| Ionising radiation                      | kBq Co-60 eq             | 1.000  | 0.468   | 1.552  | 0.454   | 1.902  | 1.309   | 1.449  | 0.462   | 1.150  | 0.293   |
| Ozone formation, Human health           | g NO <sub>x</sub> eq     | 5.009  | 3.920   | 5.996  | 3.751   | 1.717  | 0.505   | 4.412  | 2.395   | 4.695  | 2.942   |
| Fine particulate matter formation       | g PM <sub>2.5</sub> eq   | 6.020  | 4.744   | 7.745  | 5.113   | 4.977  | 3.556   | 7.005  | 4.640   | 6.918  | 4.862   |
| Ozone formation, Terrestrial ecosystems | g NO <sub>x</sub> eq     | 5.772  | 4.199   | 7.224  | 3.981   | 2.458  | 0.707   | 5.527  | 2.613   | 5.690  | 3.157   |
| Terrestrial acidification               | g SO <sub>2</sub> eq     | 12.239 | 11.673  | 12.446 | 11.279  | 7.769  | 7.139   | 11.739 | 10.690  | 11.695 | 10.783  |
| Freshwater eutrophication               | g P eq                   | 2.235  | 1.637   | 4.812  | 3.578   | 2.113  | 1.447   | 2.579  | 1.470   | 2.737  | 1.773   |
| Marine eutrophication                   | g N eq                   | 0.381  | 0.282   | 0.637  | 0.433   | 0.407  | 0.297   | 0.457  | 0.274   | 0.472  | 0.313   |
| Terrestrial ecotoxicity                 | kg 1,4-DCB               | 34.334 | 26.442  | 60.509 | 44.239  | 42.772 | 33.987  | 42.134 | 27.515  | 51.341 | 38.633  |
| Freshwater ecotoxicity                  | kg 1,4-DCB               | 1.023  | 0.963   | 1.167  | 1.044   | 0.967  | 0.900   | 1.030  | 0.919   | 0.940  | 0.844   |
| Marine ecotoxicity                      | kg 1,4-DCB               | 1.268  | 1.183   | 1.484  | 1.311   | 1.208  | 1.115   | 1.296  | 1.140   | 1.197  | 1.061   |
| Human carcinogenic toxicity             | kg 1,4-DCB               | 0.209  | 0.245   | 0.300  | 0.375   | 0.194  | 0.234   | 0.154  | 0.221   | 0.207  | 0.266   |
| Human non-carcinogenic toxicity         | kg 1,4-DCB               | 8.545  | 6.462   | 13.319 | 9.026   | 8.784  | 6.466   | 10.043 | 6.185   | 10.183 | 6.829   |
| Land use                                | m <sup>2</sup> a crop eq | 0.323  | 0.214   | 0.673  | 0.447   | 0.406  | 0.284   | 0.393  | 0.190   | 0.572  | 0.396   |
| Mineral resource scarcity               | g Cu eq                  | 30.165 | 27.731  | 40.769 | 35.752  | 32.925 | 30.217  | 31.281 | 26.773  | 35.119 | 31.201  |
| Fossil resource scarcity                | kg oil eq                | 0.662  | 0.382   | 0.826  | 0.249   | -0.249 | -0.561  | 0.143  | -0.376  | 0.619  | 0.168   |
| Water consumption                       | m <sup>3</sup>           | 0.037  | 0.023   | 0.084  | 0.055   | 0.052  | 0.037   | 0.066  | 0.040   | 0.082  | 0.060   |

**Table D-3. e-jet fuel from CO<sub>2</sub> from direct air capture based on a high temperature, liquid solvent system (DAC-HT).**

| Impact category                         | Unit                     | GB     |         | DE     |         | FR     |         | ES     |         | IT     |         |
|-----------------------------------------|--------------------------|--------|---------|--------|---------|--------|---------|--------|---------|--------|---------|
|                                         |                          | Tanks  | Caverns |
| Global warming                          | kg CO <sub>2</sub> eq    | 2.806  | 2.802   | 3.980  | 3.971   | 1.838  | 1.834   | 2.321  | 2.314   | 3.160  | 3.154   |
| Stratospheric ozone depletion           | mg CFC-11 eq             | 1.952  | 1.173   | 3.799  | 2.193   | 1.958  | 1.091   | 2.593  | 1.151   | 3.117  | 1.863   |
| Ionising radiation                      | kBq Co-60 eq             | 1.162  | 0.630   | 1.659  | 0.561   | 2.423  | 1.831   | 1.615  | 0.628   | 1.156  | 0.298   |
| Ozone formation, Human health           | g NO <sub>x</sub> eq     | 7.588  | 6.499   | 9.605  | 7.360   | 5.730  | 4.518   | 8.628  | 6.610   | 8.937  | 7.184   |
| Fine particulate matter formation       | g PM <sub>2.5</sub> eq   | 6.329  | 5.052   | 8.538  | 5.906   | 5.436  | 4.015   | 7.871  | 5.506   | 8.037  | 5.981   |
| Ozone formation, Terrestrial ecosystems | g NO <sub>x</sub> eq     | 8.253  | 6.680   | 10.884 | 7.641   | 6.481  | 4.730   | 9.711  | 6.796   | 9.990  | 7.457   |
| Terrestrial acidification               | g SO <sub>2</sub> eq     | 13.299 | 12.733  | 15.417 | 14.250  | 9.265  | 8.635   | 13.878 | 12.829  | 15.449 | 14.537  |
| Freshwater eutrophication               | g P eq                   | 2.367  | 1.768   | 5.650  | 4.416   | 2.107  | 1.441   | 2.713  | 1.605   | 2.844  | 1.880   |
| Marine eutrophication                   | g N eq                   | 0.264  | 0.165   | 0.567  | 0.363   | 0.289  | 0.179   | 0.341  | 0.158   | 0.355  | 0.196   |
| Terrestrial ecotoxicity                 | kg 1,4-DCB               | 34.860 | 26.967  | 61.090 | 44.820  | 43.490 | 34.706  | 42.928 | 28.309  | 52.037 | 39.329  |
| Freshwater ecotoxicity                  | kg 1,4-DCB               | 1.027  | 0.967   | 1.191  | 1.067   | 0.969  | 0.902   | 1.037  | 0.926   | 0.946  | 0.850   |
| Marine ecotoxicity                      | kg 1,4-DCB               | 1.288  | 1.204   | 1.523  | 1.349   | 1.222  | 1.128   | 1.309  | 1.152   | 1.207  | 1.071   |
| Human carcinogenic toxicity             | kg 1,4-DCB               | 0.218  | 0.254   | 0.342  | 0.417   | 0.200  | 0.241   | 0.173  | 0.240   | 0.219  | 0.277   |
| Human non-carcinogenic toxicity         | kg 1,4-DCB               | 8.704  | 6.622   | 13.984 | 9.691   | 8.864  | 6.546   | 10.230 | 6.372   | 10.356 | 7.002   |
| Land use                                | m <sup>2</sup> a crop eq | 0.356  | 0.246   | 0.689  | 0.463   | 0.410  | 0.288   | 0.404  | 0.201   | 0.589  | 0.412   |
| Mineral resource scarcity               | g Cu eq                  | 30.209 | 27.776  | 41.543 | 36.526  | 34.367 | 31.659  | 32.942 | 28.434  | 36.181 | 32.263  |
| Fossil resource scarcity                | kg oil eq                | 1.385  | 1.105   | 1.896  | 1.319   | 1.115  | 0.803   | 1.454  | 0.936   | 1.636  | 1.185   |
| Water consumption                       | m <sup>3</sup>           | 0.057  | 0.043   | 0.106  | 0.077   | 0.077  | 0.061   | 0.075  | 0.049   | 0.106  | 0.084   |

**Table D-4. e-jet fuel from CO<sub>2</sub> from direct air capture based on a low temperature, solid sorbent system (DAC-LT)**

| Impact category                         | Unit                     | GB     |         | DE     |         | FR     |         | ES     |         | IT     |         |
|-----------------------------------------|--------------------------|--------|---------|--------|---------|--------|---------|--------|---------|--------|---------|
|                                         |                          | Tanks  | Caverns |
| Global warming                          | kg CO <sub>2</sub> eq    | 3.954  | 3.950   | 5.495  | 5.487   | 2.978  | 2.973   | 4.011  | 4.004   | 5.296  | 5.290   |
| Stratospheric ozone depletion           | mg CFC-11 eq             | 3.681  | 2.902   | 6.091  | 4.485   | 5.674  | 4.807   | 4.250  | 2.808   | 5.481  | 4.227   |
| Ionising radiation                      | kBq Co-60 eq             | 1.572  | 1.039   | 1.940  | 0.843   | 3.545  | 2.952   | 1.962  | 0.976   | 1.238  | 0.380   |
| Ozone formation, Human health           | g NO <sub>x</sub> eq     | 11.401 | 10.312  | 12.325 | 10.080  | 11.231 | 10.019  | 16.747 | 14.730  | 15.725 | 13.972  |
| Fine particulate matter formation       | g PM <sub>2.5</sub> eq   | 8.435  | 7.159   | 10.015 | 7.383   | 8.384  | 6.963   | 11.579 | 9.214   | 12.984 | 10.928  |
| Ozone formation, Terrestrial ecosystems | g NO <sub>x</sub> eq     | 12.081 | 10.508  | 13.624 | 10.381  | 12.012 | 10.261  | 17.862 | 14.948  | 16.833 | 14.300  |
| Terrestrial acidification               | g SO <sub>2</sub> eq     | 19.376 | 18.810  | 20.204 | 19.037  | 18.195 | 17.565  | 24.626 | 23.578  | 31.201 | 30.289  |
| Freshwater eutrophication               | g P eq                   | 2.831  | 2.232   | 7.696  | 6.462   | 2.234  | 1.567   | 3.013  | 1.905   | 3.175  | 2.211   |
| Marine eutrophication                   | g N eq                   | 0.365  | 0.267   | 0.768  | 0.564   | 0.381  | 0.271   | 0.430  | 0.247   | 0.448  | 0.289   |
| Terrestrial ecotoxicity                 | kg 1,4-DCB               | 37.484 | 29.591  | 65.701 | 49.431  | 48.821 | 40.037  | 47.145 | 32.525  | 58.360 | 45.652  |
| Freshwater ecotoxicity                  | kg 1,4-DCB               | 1.055  | 0.995   | 1.276  | 1.152   | 0.983  | 0.916   | 1.055  | 0.943   | 0.969  | 0.872   |
| Marine ecotoxicity                      | kg 1,4-DCB               | 1.334  | 1.250   | 1.642  | 1.468   | 1.245  | 1.151   | 1.336  | 1.180   | 1.242  | 1.107   |
| Human carcinogenic toxicity             | kg 1,4-DCB               | 0.281  | 0.317   | 0.474  | 0.549   | 0.238  | 0.278   | 0.220  | 0.288   | 0.267  | 0.326   |
| Human non-carcinogenic toxicity         | kg 1,4-DCB               | 9.694  | 7.611   | 16.599 | 12.305  | 9.425  | 7.107   | 10.867 | 7.009   | 11.145 | 7.792   |
| Land use                                | m <sup>2</sup> a crop eq | 0.865  | 0.755   | 0.859  | 0.634   | 0.725  | 0.603   | 0.883  | 0.680   | 1.012  | 0.836   |
| Mineral resource scarcity               | g Cu eq                  | 35.555 | 33.121  | 56.095 | 51.078  | 39.635 | 36.926  | 36.310 | 31.802  | 40.673 | 36.754  |
| Fossil resource scarcity                | kg oil eq                | 1.930  | 1.651   | 2.034  | 1.457   | 1.249  | 0.937   | 1.678  | 1.160   | 2.046  | 1.595   |
| Water consumption                       | m <sup>3</sup>           | 0.055  | 0.041   | 0.107  | 0.078   | 0.102  | 0.087   | 0.103  | 0.077   | 0.151  | 0.129   |

## References

- 1 R. Frazier, E. Jin and A. Kumar, Life Cycle Assessment of Biochar versus Metal Catalysts Used in Syngas Cleaning, *Energies*, 2015, **8**, 621–644.
- 2 N. Laosiripojana, W. Sutthisripok and S. Assabumrungrat, Synthesis gas production from dry reforming of methane over CeO<sub>2</sub> doped Ni/Al<sub>2</sub>O<sub>3</sub>, *Chemical Engineering Journal*, 2005, **112**, 13–22.
- 3 N. Jungbluth, R. Frischknecht, Faist Emmenegger, M., Steiner, R. and M. Tuchschnid, Life Cycle Assessment of BTL-fuel production: Inventory Analysis., 2007.
- 4 K. Ibrik, Kinetics of the Fischer-Tropsch Reaction Over Alumina Supported Cobalt Catalyst in a Slurry Reactor, *Qatar Foundation Annual Research Forum Proceedings*, 2011, EGPS2.
- 5 T. Hengsawad, C. Srimingkwanchai, S. Butnark, D. E. Resasco and S. Jongpatiwut, Effect of Metal–Acid Balance on Hydroprocessed Renewable Jet Fuel Synthesis from Hydrocracking and Hydroisomerization of Biohydrogenated Diesel over Pt-Supported Catalysts, *Industrial & Engineering Chemistry Research*, 2018, **57**, 1429–1440.
- 6 Y. Liu, K. Murata, K. Okabe, M. Inaba, I. Takahara, T. Hanaoka and K. Sakanishi, Selective hydrocracking of fischer-tropsch waxes to high-quality diesel fuel over pt-promoted polyoxocation-pillared montmorillonites, *Topics in Catalysis*, 2009, **52**, 597–608.
- 7 R. D. Pehlke, in *Encyclopedia of materials*, ed. K. H. J. Buschow, Elsevier, Amsterdam, New York, 2001, pp. 8824–8832.
- 8 Aspen Technology, AspenTech: Knowledge Base, [https://esupport.aspentech.com/S\\_Article?id=000067208](https://esupport.aspentech.com/S_Article?id=000067208), (accessed 6 January 2020).
- 9 H. Nojumi, I. Dincer and G. F. Naterer, Greenhouse gas emissions assessment of hydrogen and kerosene-fueled aircraft propulsion, *International Journal of Hydrogen Energy*, 2009, **34**, 1363–1369.
- 10 N. Belmonte, C. Luetto, S. Staulo, P. Rizzi and M. Baricco, Case Studies of Energy Storage with Fuel Cells and Batteries for Stationary and Mobile Applications, *Challenges*, 2017, **8**, 9.
- 11 V. Tietze, S. Luhr and D. Stolten, in *Hydrogen Science and Engineering : Materials, Processes, Systems and Technology*, ed. P. D. Stolten and D. B. Emonts, Wiley-VCH Verlag GmbH & Co. KGaA, Weinheim, Germany, 2016, pp. 659–690.
- 12 C. Wulf, M. Reuß, T. Grube, P. Zapp, M. Robinus, J.-F. Hake and D. Stolten, Life Cycle Assessment of hydrogen transport and distribution options, *Journal of Cleaner Production*, 2018, **199**, 431–443.
- 13 D. J. Jovan and G. Dolanc, Can Green Hydrogen Production Be Economically Viable under Current Market Conditions, *Energies*, 2020, **13**, 6599.
- 14 C. Ganzer and N. Mac Dowell, A comparative assessment framework for sustainable production of fuels and chemicals explicitly accounting for intermittency, *Sustainable Energy Fuels*, 2020. DOI: 10.1039/C9SE01239G.
- 15 D. Iribarren, F. Petrakopoulou and J. Dufour, Environmental and thermodynamic evaluation of CO<sub>2</sub> capture, transport and storage with and without enhanced resource recovery, *Energy*, 2013, **50**, 477–485.
- 16 F. Petrakopoulou, D. Iribarren and J. Dufour, Life-cycle performance of natural gas power plants with pre-combustion CO<sub>2</sub> capture, *Greenhouse Gas Sci Technol*, 2015, **5**, 268–276.
- 17 D. W. Keith, G. Holmes, D. St. Angelo and K. Heidel, A Process for Capturing CO<sub>2</sub> from the Atmosphere, *Joule*, 2018, **2**, 1573–1594.
- 18 S. Deutz and A. Bardow, Life-cycle assessment of an industrial direct air capture process based on temperature–vacuum swing adsorption, *Nat Energy*, 2021, **6**, 203–213.
- 19 S. Michailos, S. McCord, V. Sick, G. Stokes and P. Styring, Dimethyl ether synthesis via captured CO<sub>2</sub> hydrogenation within the power to liquids concept, *Energy Conversion and Management*, 2019, **184**, 262–276.
- 20 B. V. Mathiesen, I. Ridjan, D. Connolly, M. P. Nielsen, P. V. Hendriksen, M. B. Mogensen, S. H. Jensen and S. D. Ebbesen, *Technology data for high temperature solid oxide electrolyser cells, alkali and PEM electrolysers. Technology data for high temperature solid oxide electrolyser cells, alkali and PEM electrolysers*, Department of Development and Planning, Aalborg University 978-87-91404-46-7 [Add to Citavi project by ISBN], 2013.
- 21 M. Carmo, D. L. Fritz, J. Mergel and D. Stolten, A comprehensive review on PEM water electrolysis, *International Journal of Hydrogen Energy*, 2013, **38**, 4901–4934.
- 22 F. G. Albrecht, D. H. König, N. Baucks and R.-U. Dietrich, A standardized methodology for the techno-economic evaluation of alternative fuels – A case study, *Fuel*, 2017, **194**, 511–526.
- 23 P. Fernandez, M. Martinez and I. Fernández Acín, Market Risk Premium and Risk-Free Rate Used for 69 Countries in 2019: A Survey, *SSRN Journal*, 2019. DOI: 10.2139/ssrn.3358901.
- 24 E. Asmelash and Prakash, Gayathri, Kadir, Maisarah, Wind and Solar PV – what we need by 2050, 2020.
- 25 O. Schmidt, S. Melchior, A. Hawkes and I. Staffell, Projecting the Future Levelized Cost of Electricity Storage Technologies, *Joule*, 2019, **3**, 81–100.

- 26 J. Speirs, P. Balcombe, E. Johnson, J. Martin, N. Brandon and A. Hawkes, A greener gas grid: What are the options, *Energy Policy*, 2018, **118**, 291–297.
- 27 L. Hoseinzade and T. A. Adams, Techno-economic and environmental analyses of a novel, sustainable process for production of liquid fuels using helium heat transfer, *Applied Energy*, 2019, **236**, 850–866.
- 28 E. S. Rubin, J. E. Davison and H. J. Herzog, The cost of CO<sub>2</sub> capture and storage, *International Journal of Greenhouse Gas Control*, 2015, **40**, 378–400.
- 29 H. J. Herzog, Direct air capture: A process engineer's view, 2021.
- 30 Eurostat, Electricity prices for non-household consumers, [https://ec.europa.eu/eurostat/databrowser/view/nrg\\_pc\\_205/default/table?lang=en](https://ec.europa.eu/eurostat/databrowser/view/nrg_pc_205/default/table?lang=en), (accessed 9 January 2022).
- 31 R. Turton, *Analysis, synthesis, and design of chemical processes*, Prentice Hall, Boston, 5th edn., 2018.
